# Supplementary material for: Spontaneous, oscillatory liquid transport in surface tension-confined microfluidics
Source: Royal Society of Chemistry journal article supplement (doi:10.1039/b819887j), 2009-01-01
Supplement: b819887j.pdf [file b819887j.pdf]

## Supplementary material

The following two video files are included as supplementary material:

1. time lapse 100-0.avi: The time-lapse video of the first experiment with 100% food coloring vs. 0% food coloring. The actual interval between frames is 94 ms.
2. time lapse 100-25.avi: The time-lapse video of the second experiment with 100% food coloring vs. 25% food coloring. The actual interval between frames is 280 ms.
